# Supplementary material for: Facile synthesis of a nickel vanadate/Ni composite and its electrochemical performance as an anode for lithium ion batteries
Source: Royal Society of Chemistry journal article supplement (doi:10.1039/c6ra19430c), 2016-01-01
Supplement: c6ra19430c1.pdf [file c6ra19430c1.pdf]

## Electronic Supplementary Information

### **Facile synthesis of nickel vanadate/Ni composite and its electrochemical performance as anode for lithium ion batteries**

Yang Li<sup>a</sup>, Ling-Bin Kong<sup>a,b,\*</sup>, Mao-Cheng Liu<sup>a,b</sup>, and Long Kang<sup>a,b</sup>

<sup>a</sup> *State Key Laboratory of Advanced Processing and Recycling of Non-ferrous Metals,*

*Lanzhou University of Technology, Lanzhou 730050, P. R. China*

<sup>b</sup> *School of Materials Science and Engineering, Lanzhou University of Technology, Lanzhou*

*730050, P. R. China*

\* Corresponding author. Tel.: +86-931-2976579, Fax: +86-931-2976578,

E-mail: konglb@lut.cn

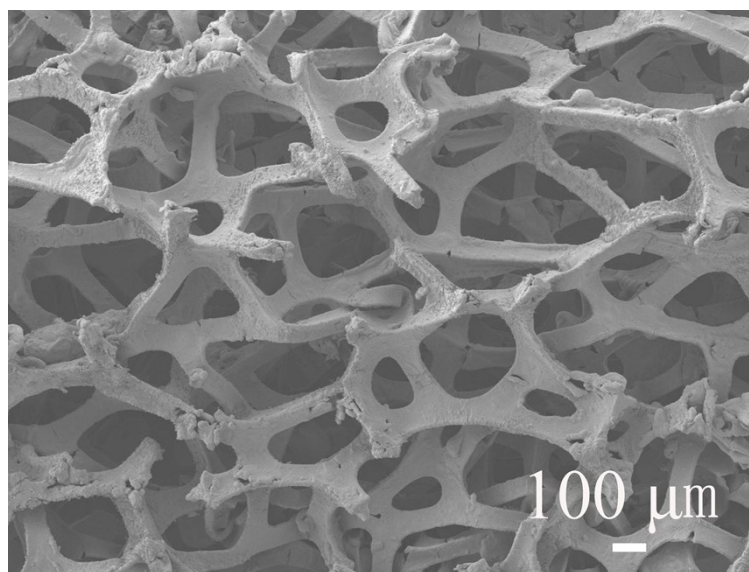

**Fig. S1** SEM pattern of  $\text{Ni}_3\text{V}_2\text{O}_8/\text{Ni}$  composites with low magnification.

**Table S1** Quantitative analysis of Ni and V contents of the samples by ICP-MS.

| Samples                           | Ni % | V %  | Ni/V mole ratio |
|-----------------------------------|------|------|-----------------|
| $\text{Ni}_3\text{V}_2\text{O}_8$ | 59.4 | 38.6 | 1.54:1          |

**Table S2** Impedance parameters calculated from equivalent circuit model.

|                  | $\text{Ni}_3\text{V}_2\text{O}_8$ powders<br>(Fresh electrode) | $\text{Ni}_3\text{V}_2\text{O}_8/\text{Ni}$<br>(Fresh electrode) | $\text{Ni}_3\text{V}_2\text{O}_8/\text{Ni}$ (5 <sup>th</sup> ) | $\text{Ni}_3\text{V}_2\text{O}_8/\text{Ni}$ (100 <sup>th</sup> ) |
|------------------|----------------------------------------------------------------|------------------------------------------------------------------|----------------------------------------------------------------|------------------------------------------------------------------|
| Rs ( $\Omega$ )  | 5.2                                                            | 3.4                                                              | 7.1                                                            | 11.7                                                             |
| Rct ( $\Omega$ ) | 94.1                                                           | 60.4                                                             | 29.3                                                           | 28.9                                                             |
